# Supplementary material for: Metal–ligand ring aromaticity in a 2D coordination polymer used as a photosensitive electronic device
Source: Royal Society of Chemistry journal article supplement (doi:10.1039/c8nj05526b), 2019-01-01
Supplement: c8nj05526b1.pdf [file c8nj05526b1.pdf]

## Metal-ligand ring aromaticity in a 2D coordination polymer used as a photosensitive electronic device

Faruk Ahmed,<sup>a</sup> Sourav Ranjan Ghosh,<sup>b,d</sup> Soumi Halder,<sup>c</sup> Surajit Guin,<sup>b</sup> Seikh Mafiz Alam,<sup>a</sup>  
Partha Pratim Ray,<sup>\*c</sup> Atish Dipankar Jana<sup>\*b</sup> and Mohammad Hedayetullah Mir<sup>\*a</sup>

<sup>a</sup>Department of Chemistry, Aliah University, New Town, Kolkata 700 156. Email: [chmmir@gmail.com](mailto:chmmir@gmail.com)

<sup>b</sup>Department of Physics, Behala College, Parnasree, Kolkata, 700 060, India. Email: [atishdipankarjana@yahoo.in](mailto:atishdipankarjana@yahoo.in)

<sup>c</sup>Department of Physics, Jadavpur University, Jadavpur, Kolkata 700 032, India.

<sup>d</sup>Department of Physics, Heritage Institute of Technology Kolkata 700 107, India

### Supporting Information

#### 1. List of Figures

**Fig. S1:** A part of 2D structural network of **1** showing fes Shubnikov plane net (4.8<sup>2</sup>)

**Fig. S2:** H-bonding pattern in 2D sheet of compound **1**

**Fig. S3:** DFT computed interaction energy of inter-layer  $\pi \cdots \pi$  interaction, and two C-H $\cdots$  $\pi$  interactions (for one H $\cdots$ centroid distance is 2.79Å and for other it is 3.0Å) of **1**

**Fig S4:** C-H $\cdots$  $\pi$ (metal-ligand ring) and  $\pi \cdots \pi$  interactions in **1**.

**Fig S5:** Variation of NICS value with height from mean plane at the center and at point 1 of the 14-member ring. Basis set dependency of the results have been shown in the inset.

**Fig. S6:** TGA plot of compound **1** under N<sub>2</sub> atmosphere

**Fig. S7:** Powder X-ray diffraction patterns of simulated **1** (black) and as-synthesized **1** (red).

**Fig. S8:** FESEM image of compound **1**.

**Fig. S9:** (a) 2D fingerprint plot (full); (b) 2D fingerprint plot with C $\cdots$ H/H $\cdots$ C interactions (c) 2D fingerprint plot with O $\cdots$ H/H $\cdots$ O interactions (d) 2D fingerprint plot with C $\cdots$ C interactions highlighted in colour.

**Fig. S10:** ELF- $\sigma$  and ELF- $\pi$  over the 14 member ring

## 2. List of Tables

**Table S1:** Crystal data and refinement parameters for compound **1**

**Table S2:** Selected bond lengths and bond angles in **1**

**Table S3:** Hydrogen bonding interactions in **1**

**Table S4:** C-H $\cdots\pi$  interactions in **1**

**Table S5:**  $\pi\cdots\pi$  interactions in **1**

**Table S6:** Variation of NICS values (in ppm) with height at different points of the 14 member metal-ligand ring

**Table S7:** Calculated NICS(0) values at the 14 member metal-ligand ring center and at point(1) for different level of theory

**Table S8:** Component wise variation of NICS values with height at point (1)

**Table S9:** Basis set superposition error (BSSE) corrected binding energies of the C-H $\cdots\pi$  interaction involving 14-member metal-ligand ring and 4-ppy computed at HF/6-31G(d,p) and HF/6-311++G(d,p) level of theory

**Table S10:** Binding energies of the C-H $\cdots\pi$  interaction involving 14-member metal-ligand ring and 4-ppy,  $\pi\cdots\pi$  and two different C-H $\cdots\pi$  interaction among 4-ppy molecules computed at DFT/M06-2X/6-31G(d,p) level of theory

## 3. References

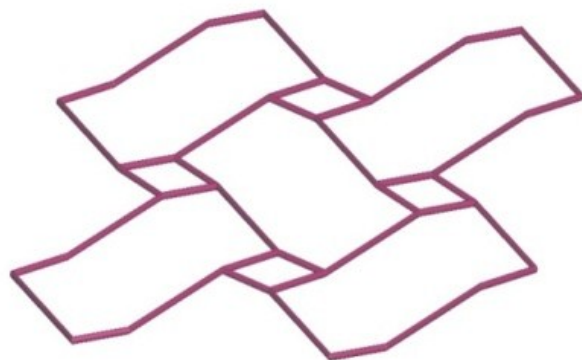

**Fig. S1.** A part of 2D structural network of **1** showing fes Shubnikov plane net ( $4.8^2$ ).

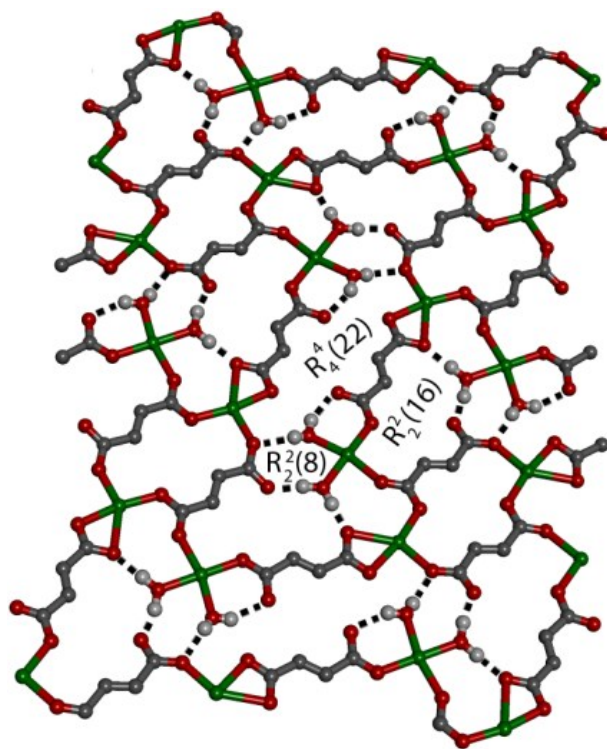

**Fig. S2.** H-bonding pattern in 2D sheet of compound **1**.

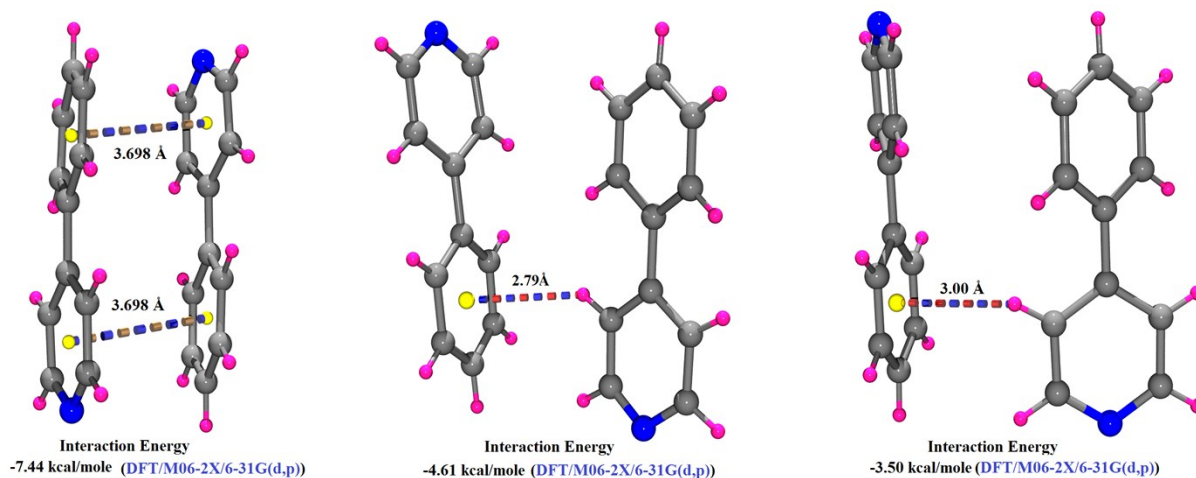

**Fig. S3.** DFT computed interaction energy of inter-layer  $\pi \cdots \pi$  interaction, and two C-H $\cdots$  $\pi$  interactions (for one H $\cdots$ centroid distance is 2.79Å and for other it is 3.0Å) of **1**.

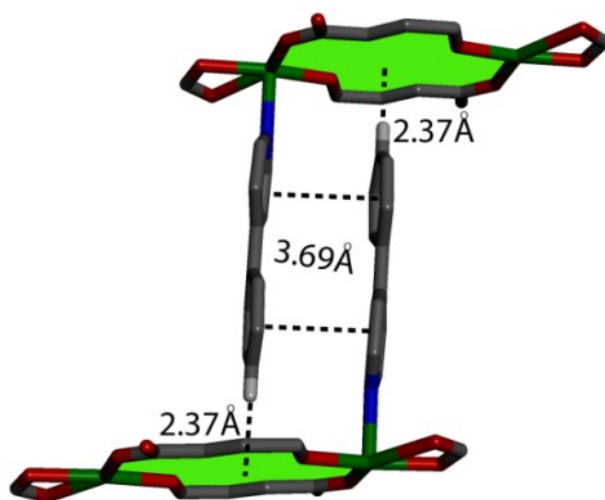

**Fig. S4.** C-H $\cdots$  $\pi$ (metal-ligand ring) and  $\pi \cdots \pi$  interactions in **1**.

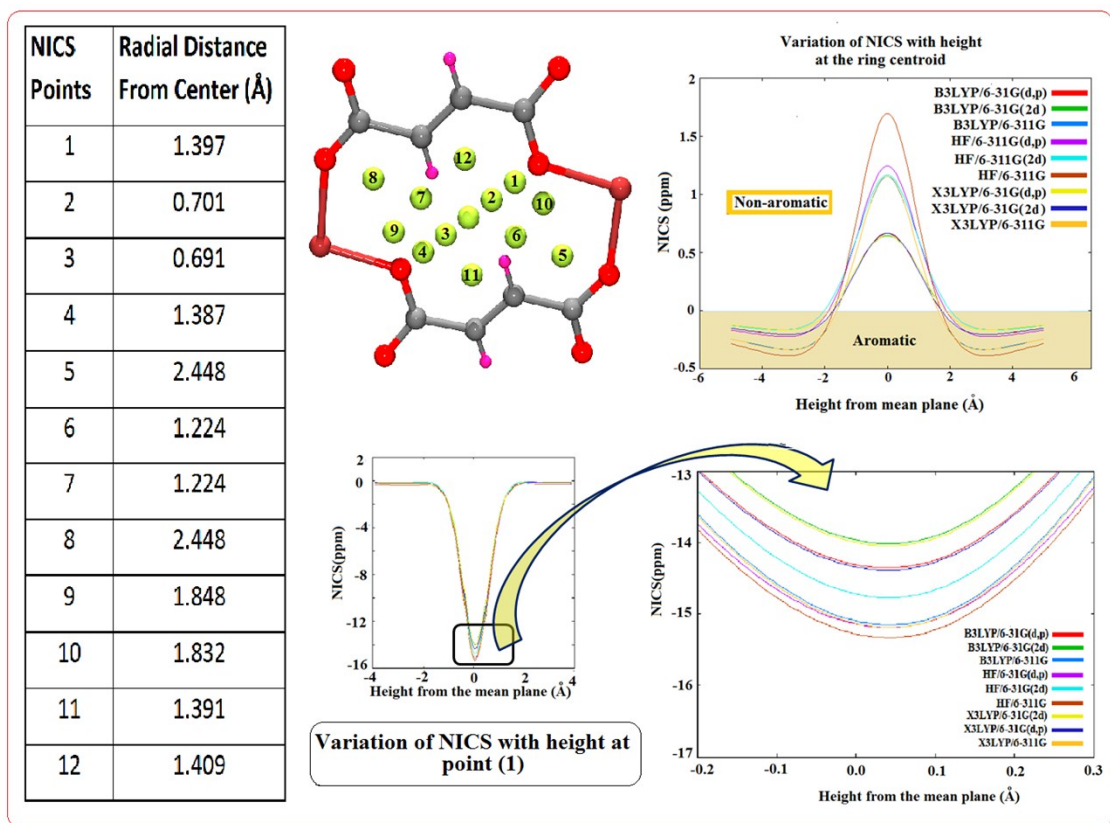

**Fig. S5.** Variation of NICS value with height from mean plane at the center and at point 1 of the 14-member ring. Basis set dependency of the results have been shown in the inset.

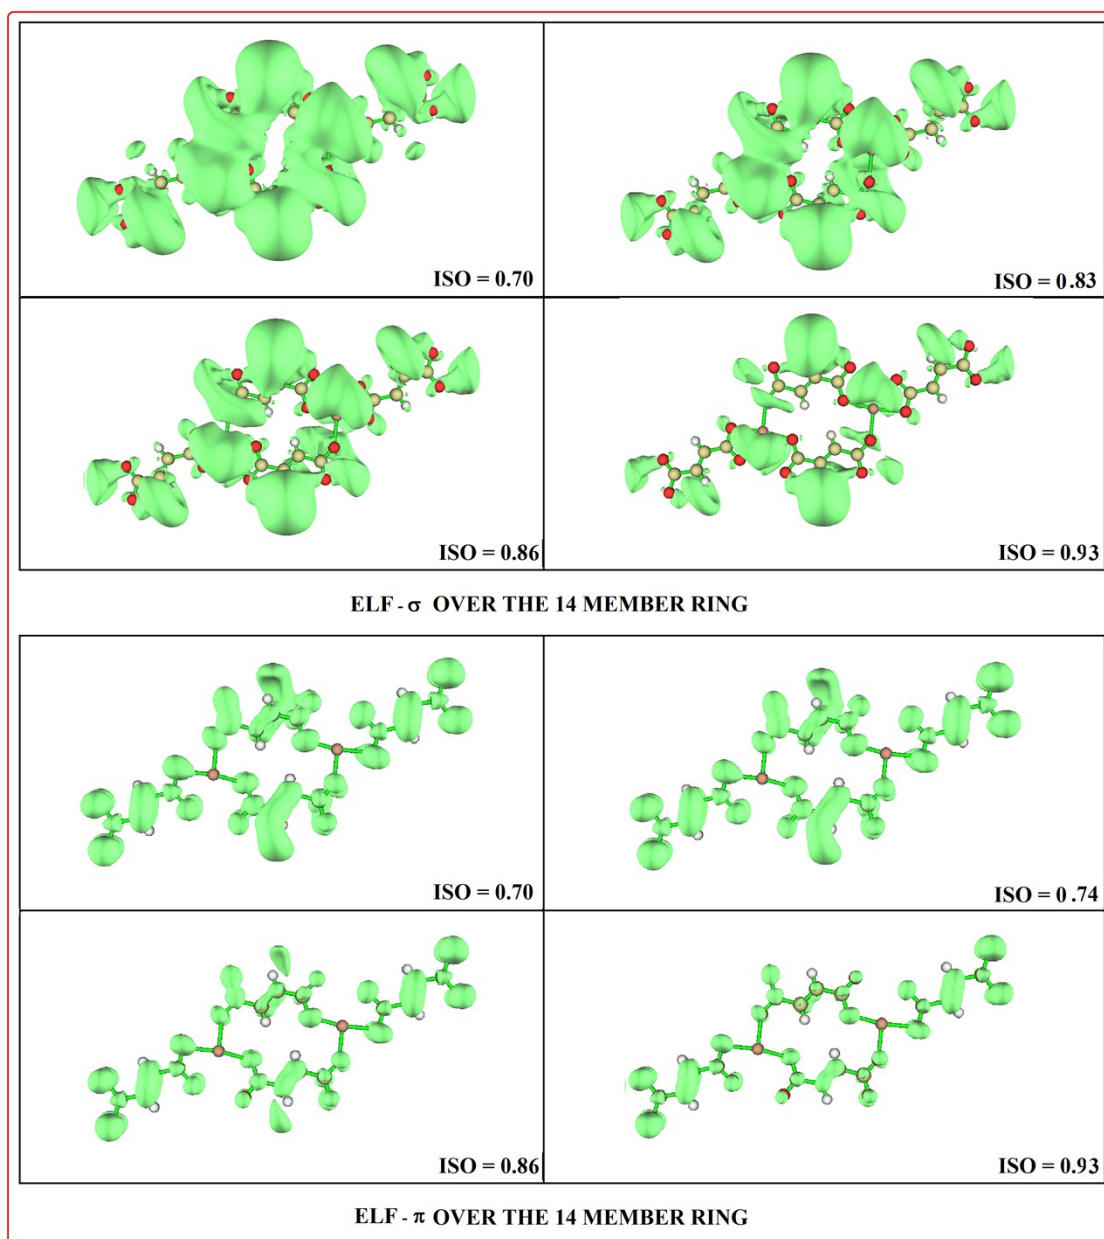

**Fig. S6.** ELF- $\sigma$  and ELF- $\pi$  over the 14 member ring

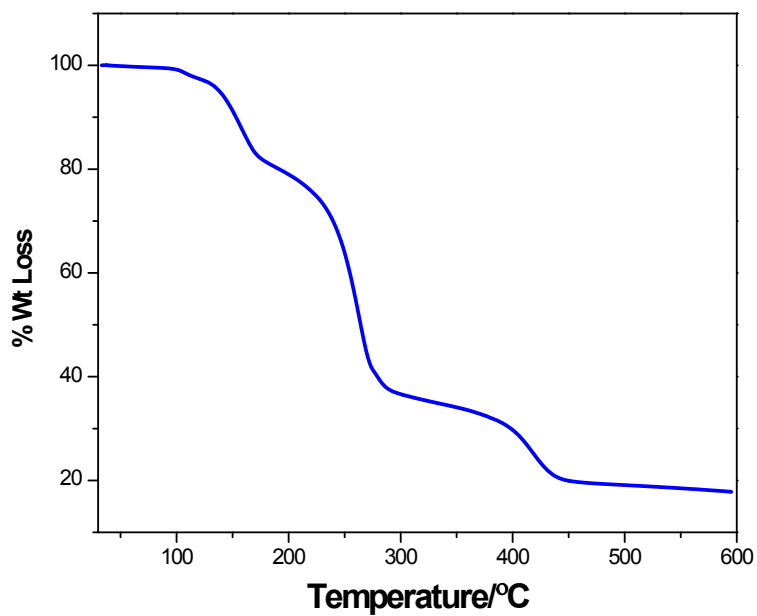

**Fig. S7.** TGA plot of compound **1** under N<sub>2</sub> atmosphere.

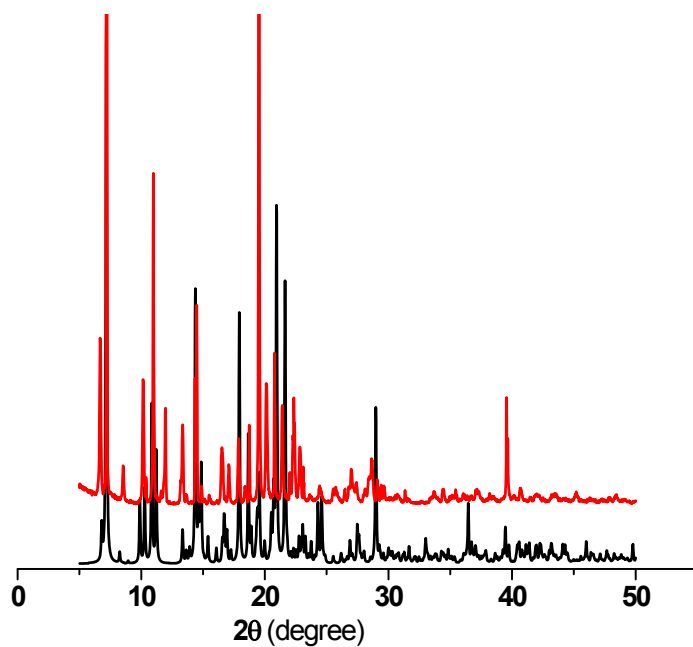

**Fig. S8.** Powder X-ray diffraction patterns of simulated **1** (black) and as-synthesized **1** (red).

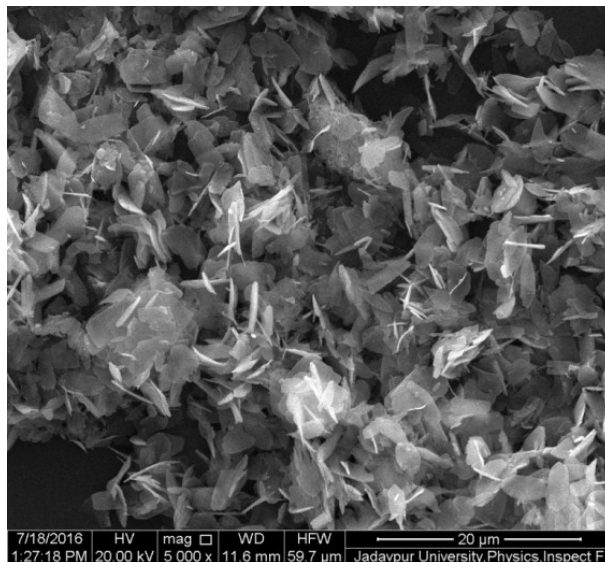

**Fig. S9.** FESEM image of compound 1.

### **The Hirshfeld Surface Analysis:**

Hirshfeld surfaces<sup>1-3</sup> and the associated two-dimensional (2D) fingerprint<sup>4-6</sup> plots were calculated with the help of Crystal Explorer<sup>7</sup> using cif of the complex. The normalized contact distance ( $d_{norm}$ ) based on  $d_e$  and  $d_i$  is given by

$$d_{norm} = \frac{(d_i - r_i^{vdw})}{r_i^{vdw}} + \frac{(d_e - r_e^{vdw})}{r_e^{vdw}}$$

where  $r_i^{vdw}$  and  $r_e^{vdw}$  are the van der Waals radii of the atoms;  $d_e$  is the distance from the point to the nearest nucleus external to the surface and  $d_i$  is the distance to the nearest nucleus internal to the surface. Bright red spots highlight shorter contacts, white areas represent contacts around van der Waals separation, and blue regions are devoid of close contacts in the Hirshfeld surface.



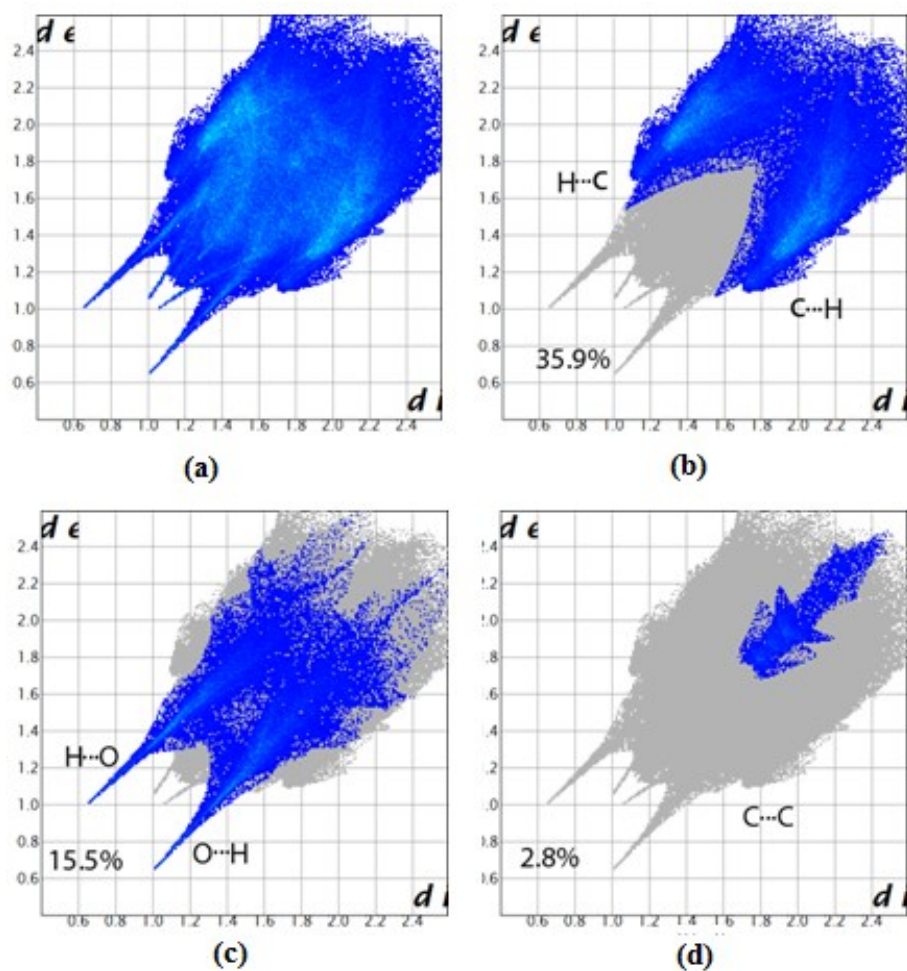

**Fig. S10.** (a) 2D fingerprint plot (full); (b) 2D fingerprint plot with C···H/H···C interactions (c) 2D fingerprint plot with O···H/H···O interactions (d) 2D fingerprint plot with C···C interactions highlighted in colour.

**Table S1** Crystal data and refinement parameters for compound **1**

| Formula                                                                     | C <sub>52</sub> H <sub>44</sub> Zn <sub>2</sub> N <sub>4</sub> O <sub>10</sub> |
|-----------------------------------------------------------------------------|--------------------------------------------------------------------------------|
| Fw                                                                          | 1015.65                                                                        |
| cryst syst                                                                  | Monoclinic                                                                     |
| space group                                                                 | <i>P</i> 2 <sub>1</sub> / <i>n</i>                                             |
| <i>a</i> (Å)                                                                | 13.4470(5)                                                                     |
| <i>b</i> (Å)                                                                | 19.7664(7)                                                                     |
| <i>c</i> (Å)                                                                | 18.1854(6)                                                                     |
| $\alpha$ (deg)                                                              | 90                                                                             |
| $\beta$ (deg)                                                               | 108.9020(10)                                                                   |
| $\gamma$ (deg)                                                              | 90                                                                             |
| <i>V</i> (Å <sup>3</sup> )                                                  | 4573.0(3)                                                                      |
| <i>Z</i>                                                                    | 4                                                                              |
| <i>D</i> <sub>calcd</sub> (g/cm <sup>3</sup> )                              | 1.475                                                                          |
| $\mu$ (mm <sup>-1</sup> )                                                   | 1.115                                                                          |
| $\lambda$ (Å)                                                               | 0.71073                                                                        |
| data [ <i>I</i> > 2 $\sigma$ ( <i>I</i> )]/params                           | 11360/ 619                                                                     |
| GOF on <i>F</i> <sup>2</sup>                                                | 0.961                                                                          |
| final <i>R</i> indices [ <i>I</i> > 2 $\sigma$ ( <i>I</i> )] <sup>a,b</sup> | R1 = 0.0572<br><i>w</i> R2 = 0.1853                                            |

<sup>[a]</sup>R1 =  $\sum ||F_o| - |F_c|| / \sum |F_o|$ , *w*R2 =  $[\sum w(F_o^2 - F_c^2)^2 / \sum w(F_o^2)^2]^{1/2}$ .

**Table S2** Selected bond lengths and bond angles in **1**

---

|                 |            |                 |            |
|-----------------|------------|-----------------|------------|
| Zn(2)-O(6)      | 2.049(2)   | Zn(1)-O(3)      | 2.0276(19) |
| Zn(2)-O(7)      | 2.078(2)   | Zn(1)-O(9)      | 2.064(2)   |
| Zn(2)-O(8)      | 2.079(2)   | Zn(1)-O(1)      | 2.101(2)   |
| Zn(2)-O(4)      | 2.125(2)   | Zn(1)-O(2)      | 2.412(3)   |
| Zn(2)-N(4)      | 2.190(3)   | Zn(1)-N(1)      | 2.195(3)   |
| Zn(2)-N(3)      | 2.198(3)   | Zn(1)-N(2)      | 2.180(3)   |
| O(6)-Zn(2)-O(7) | 96.37(9)   | O(7)-Zn(2)-N(4) | 92.86(13)  |
| O(6)-Zn(2)-O(8) | 78.19(12)  | O(8)-Zn(2)-N(4) | 92.12(13)  |
| O(6)-Zn(2)-O(4) | 97.33(8)   | O(4)-Zn(2)-N(4) | 88.10(11)  |
| O(7)-Zn(2)-O(4) | 166.27(9)  | O(6)-Zn(2)-N(3) | 88.54(11)  |
| O(7)-Zn(2)-O(8) | 84.03(9)   | O(7)-Zn(2)-N(3) | 89.08(13)  |
| O(8)-Zn(2)-O(4) | 82.25(9)   | O(8)-Zn(2)-N(3) | 89.70(13)  |
| O(6)-Zn(2)-N(4) | 89.63(11)  | O(4)-Zn(2)-N(3) | 90.40(11)  |
| N(4)-Zn(2)-N(3) | 177.47(11) |                 |            |
| O(3)-Zn(1)-O(9) | 100.24(8)  | N(2)-Zn(1)-N(1) | 172.00(12) |
| O(3)-Zn(1)-O(1) | 169.75(9)  | O(3)-Zn(1)-O(2) | 113.01(8)  |
| O(9)-Zn(1)-O(1) | 90.00(8)   | O(9)-Zn(1)-O(2) | 146.70(8)  |
| O(3)-Zn(1)-N(2) | 93.58(10)  | O(1)-Zn(1)-O(2) | 56.74(9)   |
| O(9)-Zn(1)-N(2) | 92.76(11)  | N(2)-Zn(1)-O(2) | 83.90(12)  |
| O(1)-Zn(1)-N(2) | 85.57(11)  | N(1)-Zn(1)-O(2) | 89.11(13)  |
| O(3)-Zn(1)-N(1) | 92.73(11)  | O(1)-Zn(1)-N(1) | 87.34(11)  |
| O(9)-Zn(1)-N(1) | 90.94(11)  |                 |            |

---

**Table S3** Hydrogen bonding interactions in **1**

| D-H...A            | D-H (Å) | H...A (Å) | D...A (Å) | <D-H...A (°) |
|--------------------|---------|-----------|-----------|--------------|
| O(8)-H(8A)...O(10) | 0.931   | 1.722     | 2.620     | 161.20       |
| O(8)-H(8B)...O(2)  | 0.930   | 1.709     | 2.637     | 175.41       |
| O(7)-H(7B)...O(9)  | 0.767   | 2.089     | 2.849     | 170.56       |
| O(7)-H(8)...O(5)   | 0.819   | 1.944     | 2.668     | 146.93       |

**Table S4** C-H... $\pi$  interactions in **1**

| C-H $\rightarrow$ Ring(j)      | H...R distance (Å) | C-H...R angle (°) | C...R distance (Å) |
|--------------------------------|--------------------|-------------------|--------------------|
| C(10)-H(10) $\rightarrow$ R(1) | 2.799              | 139.30            | 3.557              |
| C(45)-H(45) $\rightarrow$ R(3) | 3.001              | 131.14            | 3.680              |

R(j) denotes the j-th ring: R(1) = C(25)/C(26)/C(27)/C(28)/C(29)/C(30); R(3) = C(36)/C(37)/C(38)/C(39)/C(40)/C(41)

**Table S5**  $\pi$ ... $\pi$  interactions in **1**

| Ring(i) $\rightarrow$ Ring(j) | Distance between the (i,j) ring centroids (Å) |
|-------------------------------|-----------------------------------------------|
| R(1) $\rightarrow$ R(2)       | 3.689                                         |

R(1) is same as above and R(2) = N(2)/C(20)/C(21)/C(22)/C(23)/C(24).

**Table S6** Variation of NICS values (in ppm) with height at different points of the 14 member metal-ligand ring (Maximum negative values of NICS have been given in bold face and values for symmetry unique points are only been given in the table)

|           | Position (points) over the ring where NICS values are calculated |                  |                  |                  |                  |                  |
|-----------|------------------------------------------------------------------|------------------|------------------|------------------|------------------|------------------|
| Height(Å) | 1                                                                | 2                | 5                | 6                | 10               | 11               |
| -5.0      | -0.305400                                                        | -0.285800        | -0.258900        | -0.281400        | -0.266000        | -0.295000        |
| -4.5      | -0.313000                                                        | -0.322100        | -0.301700        | -0.321800        | -0.299000        | -0.341800        |
| -4.0      | -0.349400                                                        | -0.358700        | -0.357300        | -0.368200        | -0.334100        | -0.397600        |
| -3.5      | -0.383400                                                        | -0.389800        | -0.432300        | -0.420200        | -0.369200        | -0.463400        |
| -3.0      | -0.407900                                                        | <b>-0.402700</b> | -0.539100        | -0.476600        | -0.399600        | -0.540100        |
| -2.5      | -0.409800                                                        | -0.371100        | -0.705700        | -0.537700        | -0.416500        | -0.639600        |
| -2.0      | -0.382100                                                        | -0.245800        | -1.015000        | -0.626900        | -0.405000        | -0.818800        |
| -1.5      | -0.541000                                                        | 0.036000         | -1.674400        | -0.835700        | -0.376500        | -1.096000        |
| -1.0      | -2.286500                                                        | 0.408800         | -2.921700        | -1.342300        | -0.558000        | -1.023900        |
| -0.5      | -8.273500                                                        | 0.570700         | <b>-4.262300</b> | -2.838800        | -1.292600        | 0.041300         |
| 0.0       | <b>-15.22520</b>                                                 | 0.490000         | -3.050800        | <b>-7.582500</b> | <b>-1.911000</b> | 0.606400         |
| 0.5       | -11.02260                                                        | 0.439400         | -2.077900        | -7.281200        | -1.327500        | -0.663000        |
| 1.0       | -3.608000                                                        | 0.362700         | -2.497700        | -2.179700        | -0.369600        | <b>-1.369100</b> |
| 1.5       | -0.748900                                                        | 0.089800         | -1.824700        | -0.834300        | -0.064800        | -1.116700        |
| 2.0       | -0.297400                                                        | -0.181700        | -1.117000        | -0.558400        | -0.159800        | -0.789000        |
| 2.5       | -0.319500                                                        | -0.321900        | -0.735600        | -0.486100        | -0.262300        | -0.614000        |
| 3.0       | -0.339900                                                        | -0.367000        | -0.546200        | -0.447000        | -0.305200        | -0.511900        |
| 3.5       | -0.334200                                                        | -0.364100        | -0.434300        | -0.405200        | -0.310100        | -0.434500        |
| 4.0       | -0.314100                                                        | -0.340100        | -0.358200        | -0.361000        | -0.296300        | -0.371600        |
| 4.5       | -0.287900                                                        | -0.308600        | -0.302800        | -0.318600        | -0.274300        | -0.320100        |
| 5.0       | -0.260100                                                        | -0.276200        | -0.260200        | -0.280300        | -0.249700        | -0.277700        |

**Table S7** Calculated NICS(0) values at the 14 member metal-ligand ring center and at point(1) for different level of theory

| NICS(0) values at the centroid of the 14-member ring |            |            |            |
|------------------------------------------------------|------------|------------|------------|
| Method/basis                                         | B3LYP      | X3LYP      | HF         |
| 6-31G(2d)                                            | 0.645500   | 0.648200   | 1.165800   |
| 6-311G                                               | 1.153700   | 1.157500   | 1.695600   |
| 6-31G(d,p)                                           | 0.664500   | 0.667000   | 1.244800   |
| NICS(0) values at point(1) of the 14-member ring     |            |            |            |
| 6-31G(2d)                                            | -13.904800 | -13.938300 | -14.664600 |
| 6-311G                                               | -15.043000 | -15.076800 | -15.225200 |
| 6-31G(d,p)                                           | -14.244600 | -14.275400 | -15.080400 |

**Table S8** Component wise variation of NICS values with height at point (1)

| Height(Å) | xx      | yy      | zz      | In plane | Out plane | isotropic |
|-----------|---------|---------|---------|----------|-----------|-----------|
| 0.0       | 18.5043 | 29.0102 | -1.8388 | -15.8382 | .6129     | -15.2252  |
| 0.5       | 13.0795 | 19.9753 | 0.0130  | -11.0183 | -.0043    | -11.0226  |
| 1.0       | 3.4901  | 4.5689  | 2.7650  | -2.6863  | -.9217    | -3.6080   |
| 1.5       | 0.2134  | -0.8718 | 2.9050  | .2195    | -.9683    | -0.7489   |
| 2.0       | -0.2805 | -1.6604 | 2.8331  | .6470    | -.9444    | -0.2974   |
| 2.5       | -0.3334 | -1.5372 | 2.8289  | .6235    | -.9429    | -0.3195   |
| 3.0       | -0.3726 | -1.3506 | 2.7431  | .5744    | -.9144    | -0.3399   |
| 3.5       | -0.3891 | -1.1733 | 2.5652  | .5208    | -.8551    | -0.3342   |
| 4.0       | -0.3830 | -1.0117 | 2.3371  | .4649    | -.7790    | -0.3141   |
| 4.5       | -0.3634 | -0.8686 | 2.0956  | .4107    | -.6985    | -0.2879   |
| 5.0       | -0.3375 | -0.7447 | 1.8625  | .3607    | -.6208    | -0.2601   |

**Table S9** Basis set superposition error (BSSE) corrected binding energies of the C-H $\cdots\pi$  interaction involving 14-member metal-ligand ring and 4-phpy computed at HF/6-31G(d,p) and HF/6-311++G(d,p) level of theory

|                                         | <b>14-member ring 4-phpy C-H<math>\cdots\pi</math> interaction</b> |                  |
|-----------------------------------------|--------------------------------------------------------------------|------------------|
| Basis Set                               | HF/6-31G(d,p)                                                      | HF/6-311++G(d,p) |
| Binding Energy<br>(kcal/mole)           | -10.464976                                                         | -9.551146        |
| BSSE error<br>(kcal/mole)               | 1.890166                                                           | 0.987809         |
| Corrected Binding Energy<br>(kcal/mole) | -8.574810                                                          | -8.563337        |

**Table S10** Binding energies of the C-H $\cdots\pi$  interaction involving 14-member metal-ligand ring and 4-phpy,  $\pi\cdots\pi$  and two different C-H $\cdots\pi$  interaction among 4-phpy molecules computed at DFT/M06-2X/6-31G(d,p) level of theory

| DFT/M06-2X/6-31G(d,p)                    |                            |
|------------------------------------------|----------------------------|
| Interaction                              | Binding energy (kcal/mole) |
| 14member ring CH $\cdots\pi$ interaction | -13.621522                 |
| $\pi\cdots\pi$                           | -7.444478                  |
| C-H $\cdots\pi$ (2.79 Å)                 | -4.607138                  |
| C-H $\cdots\pi$ (3 Å)                    | -3.500504                  |

## References

1. M. A. Spackman, and D. Jayatilaka, *CrystEngComm*. 2009, **11**, 19.
2. F. L. Hirshfeld, *Theor. Chim. Acta*. 1977, **44**, 129.
3. H. F. Clausen, M. S. Chevallier, M. A. Spackman, and B. B. Iversen, *New J. Chem.* **2010**, *34*, 193.
4. A. L. Rohl, M. Moret, W. Kaminsky, K. Claborn, J. J. McKinnon, and B. Kahr, *Cryst. Growth Des.* 2008, **8**, 4517.
5. A. Parkin, G. Barr, W. Dong, C. J. Gilmore, D. Jayatilaka, J. J. McKinnon, M. A. Spackman, C. C. Wilson, *CrystEngComm*. 2007, **9**, 648.
6. M. A. Spackman, and J. J. McKinnon, *CrystEngComm*. 2002, **4**, 378.
7. S. K. Wolff, D. J. Grimwood, J. J. McKinnon, D. Jayatilaka, M. A. Spackman, *Crystal Explorer 2.0*; University of Western Australia: Perth, Australia, **2007**.  
<http://hirshfeldsurfacenet.blogspot.com/>
